# Supplementary material
Source: ML conference proceedings conference paper supplement (https://openreview.net/forum?id=VnaNemZgPj)
Supplement: supplementary_material [file attachment]

# Supplementary Materials: “SATPose: Improving Monocular 3D Pose Estimation with Spatial-aware Ground Tactility”

Anonymous Authors

## 1 SOURCE CODE

We will release the source code and pretrained models of the pressure image reconstruction network and the multimodal 3D human pose estimation network upon acceptance.

## 2 DATA COLLECTION DETAILS

### 2.1 Action Explanations

Table 1 provides a detailed description of the 16 human actions and their distribution within the dataset. Throughout the experiments, we strategically arranged the sequence of high-intensity and low-intensity actions to interleave, thus mitigating excessive fatigue from continuous exercises.

**Table 1: Explanation of the 16 human actions in the PVM dataset, along with their respective number of frames in the training and testing sets.**

| Actions                   | Explanation                                                                            | Duration                         | Train  | Test   |
|---------------------------|----------------------------------------------------------------------------------------|----------------------------------|--------|--------|
| Deep Squat                | Raise both hands overhead and squat down until thighs are parallel to the ground.      | 90s                              | 28041  | 7038   |
| Standing on Toes          | Lift the heels to balance on the balls of the feet.                                    | 90s                              | 29319  | 7216   |
| Hurdle Step               | Lift one leg over an obstacle while maintaining balance and stability.                 | L/R leg each 6 times in L/R dir. | 33843  | 7580   |
| Inline Lunge              | Extend one leg forward and kneel down with the other leg, keep both legs in a line.    | L/R leg each 6 times in L/R dir. | 34351  | 7836   |
| Marching in Place         | Lift the knees alternately while staying in the same spot.                             | 90s                              | 21469  | 5524   |
| Arm-waving                | Rhythmically swing the arms back and forth accompanied by slight knee bending.         | 90s                              | 31206  | 7125   |
| Direction                 | Hand movements accompanied by tilting the body towards the direction of the hand.      | 90s                              | 40437  | 11072  |
| Waist Turning             | Twist the waist in a circular motion.                                                  | 90s                              | 29909  | 7585   |
| Twisting                  | Twist the body back and forth from left to right while keeping both feet in place.     | 90s                              | 30335  | 7682   |
| Bending                   | Bend the body alternately toward the left and right toes.                              | 90s                              | 30380  | 7882   |
| Sitting                   | Sit on the pressure mat in any comfortable position.                                   | 90s                              | 29405  | 7577   |
| Active Straight-Leg Raise | Lie on the back and alternately lift the legs straight up.                             | 45s each in L/R dir.             | 31511  | 7798   |
| Rotary Stability          | Lift and extend the arms and legs in opposite directions in a kneeling prone position. | L/R leg each 6 times in L/R dir. | 28939  | 6489   |
| Push-ups                  | Push-ups / kneeling push-ups.                                                          | 45s each in L/R dir.             | 27763  | 6790   |
| Posing                    | Casually strike poses as if being photographed.                                        | 90s                              | 28640  | 6883   |
| Waiting                   | Stand straight or shift weight towards one leg.                                        | 90s                              | 30188  | 7710   |
| Total                     |                                                                                        |                                  | 485736 | 119787 |

### 2.2 Reflective Markers on the Mocap Suit

As shown in Fig.1, we utilized the 53-point human body marking method to label various joints of the human body, ultimately recording the 3D position information of 18 body joints.

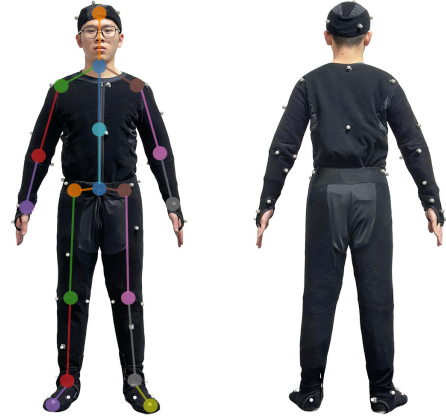

**Figure 1: An illustration of the 53-point human body marking method and the 18-joint human skeleton.**

### 2.3 2D Skeleton Construction

The open-source human pose estimation library, OpenPose [1], is utilized to extract 2D skeletons from monocular images. Specifically, we use the OpenPose model with 25 skeleton keypoints, as it exhibits greater overlap with the ground truth 3D skeleton. For the extracted 25 skeleton keypoints, we:

- Remove 6 keypoints corresponding to eyes, ears, and heels;
- Remove 4 keypoints corresponding to big toes and little toes;
- Add 2 keypoints for the toes calculated from the midpoints of the left and right big toes and little toes;
- Add a new spine keypoint calculated as the midpoint between the neck and hip keypoints.

Finally, we obtain 2D skeleton with 18 keypoints corresponding one-to-one with the 3D skeleton keypoints.

## 3 COMPARISON WITH SOTAS ON PROTOCOL #1

Another variant of MPJPE (mean per joint position error), *i.e.*, Protocol #1, is a commonly used metric in previous works to measure the accuracy of 3D human pose estimation. It calculates the average error of each joint of the human body without considering global displacement. Specifically, it computes the Euclidean distance between the predicted joints and ground truth joints in the local coordinate system after aligning the root joint of the predicted skeleton with the root joint of the ground truth skeleton.

**Table 2: Quantitative comparison results with state-of-the-art methods on protocol #0. Bold and underline indicate the best and second-best values.**

| Protocol #1               | D.S.        | S.T.        | H.S.        | I.L.        | M.P.        | A.W.        | Direction   | W.T.        | Twisting    | Bending     | Sitting     | A.S.L.R.    | R.S.        | P.U.        | Posing      | Waiting     | Avg.        |
|---------------------------|-------------|-------------|-------------|-------------|-------------|-------------|-------------|-------------|-------------|-------------|-------------|-------------|-------------|-------------|-------------|-------------|-------------|
| Shan et al. [5] MM2021    | 49.7        | 39.3        | 47.7        | 49.9        | 44.3        | 53.3        | 47.9        | 54.6        | 47.1        | 55.0        | 42.4        | 46.8        | 68.9        | 57.3        | 52.8        | 45          | 50.1        |
| Li et al. [2] ToMM2022    | 44.2        | 35.6        | 51.2        | 51.1        | 44.7        | 49.0        | <u>42.6</u> | 43.3        | 48.4        | <b>44.8</b> | 43.7        | <b>46.3</b> | 68.1        | 56.6        | 51.0        | 42.3        | 47.7        |
| Shan et al. [4] ECCV2022  | 43.7        | 36.0        | <b>47.0</b> | <u>49.6</u> | <u>42.2</u> | <u>48.0</u> | <u>42.7</u> | <u>41.7</u> | 44.3        | 47.9        | 44.6        | 62.8        | 69.4        | 62.3        | <u>49.0</u> | 42.0        | 48.3        |
| Li et al. [3] CVPR2022    | 41.8        | 37.1        | 48.8        | <b>49.0</b> | 48.1        | 48.7        | <b>40.6</b> | 44.2        | 49.2        | 57.4        | 46.6        | 48.2        | 74.2        | <b>54.4</b> | <b>48.6</b> | 39.5        | 48.5        |
| Zhang et al. [7] CVPR2022 | 46.4        | 35.6        | 54.0        | 59.7        | 46.0        | 56.5        | 45.2        | 57.6        | 52.9        | 52.6        | 46.7        | 55.4        | 77.1        | 56.3        | 52.7        | 42.5        | 52.3        |
| Zhao et al. [8] CVPR2023  | 50.6        | 37.0        | 48.3        | 51.2        | 47.0        | 55.0        | 47.2        | 43.4        | 47.5        | 57.9        | 44.1        | <u>46.6</u> | 69.0        | 58.4        | 53.3        | 43.1        | 50.0        |
| Yu et al. [6] ICCV2023    | <b>40.8</b> | 37.1        | 49.2        | 52.4        | 42.7        | <b>45.6</b> | 48.8        | 47.4        | 46.3        | 52.3        | 49.4        | 52.0        | 80.8        | 59.8        | 53.9        | 42.2        | 50.0        |
| Ours (pred. pressure)     | 42.8        | <u>33.9</u> | 48.3        | 53          | 43.5        | 51.9        | 44.0        | 42.8        | <b>43.7</b> | <u>45.3</u> | <b>42.0</b> | 46.9        | <b>66.8</b> | 55.6        | 49.4        | <u>37.8</u> | <u>46.7</u> |
| Ours                      | <u>41.4</u> | <b>33.8</b> | <u>47.4</u> | 51.5        | <b>41.7</b> | 51.3        | 42.8        | <b>40.3</b> | <u>43.9</u> | 47.4        | <u>42.1</u> | 47.9        | <u>66.9</u> | <u>54.8</u> | 49.7        | <b>37.6</b> | <b>46.3</b> |

In comparison to protocol #0, protocol #1 eliminates the global displacement bias, focusing solely on the error in the pose itself. This results in a reduced error gap between different methods, yet our method still outperforms others. The position of pressure traces provides significant gains in depth information, enabling substantial improvements over monocular methods, especially in challenging actions like sitting and rotary stability amidst occlusions. The pressure distribution within these traces offers finer guidance on centroid shifts, aiding in achieving high-precision estimation of actions such as standing on toes, waist turning, twisting, and waiting. Additionally, the disparity between results from protocol #0 and protocol #1 reflects the exceptional spatial perception capabilities of pressure images, offering robust guidance for global 3D pose estimation.

## 4 LIVE DEMO

To illustrate the viability of our multimodal 3D human pose estimation approach, we implemented a real-time demonstration. The workflow encompasses i) the real-time acquisition of 2D pose and pressure image sequence, ii) the input of these data into the 3D human pose estimation network to derive the output 3D pose, and iii) the transmission of the predicted 3D pose to the web interface for real-time visualization.

Two distinct implementations are employed for acquiring pressure images: one entails the real-time collection of sensor data from a pressure mat, and the other reconstructs pressure images in real-time from the 2D poses. As shown in Fig.2, the former achieves relatively precise pose estimation but necessitates a more intricate hardware setup (comprising a monocular camera and a pressure mat); the latter compromises a slight degree of accuracy to accommodate a lighter hardware system (solely requiring a monocular camera). These alternative implementations cater to diverse scenarios and applications, ensuring the adaptability of our methodology. Additionally, as real-time prediction lacks access to future data, and considering that the input to the pose estimation network during training comprises information from future frames, we address this limitation by duplicating future frames based on the content available in the current frame.

The real-time system estimates poses at a frame of approximately 10Hz. The time consumption for 2D pose extraction, pressure image reconstruction, and 3D pose prediction is reported to be approximately 0.098 seconds, 0.002 seconds, and 0.017 seconds, respectively. The most notable delay stems from the 2D pose extraction with

OpenPose, and future endeavors may explore swifter alternatives. Overall, our approach demonstrates reliable pose prediction results while ensuring a smooth user experience in system usage.

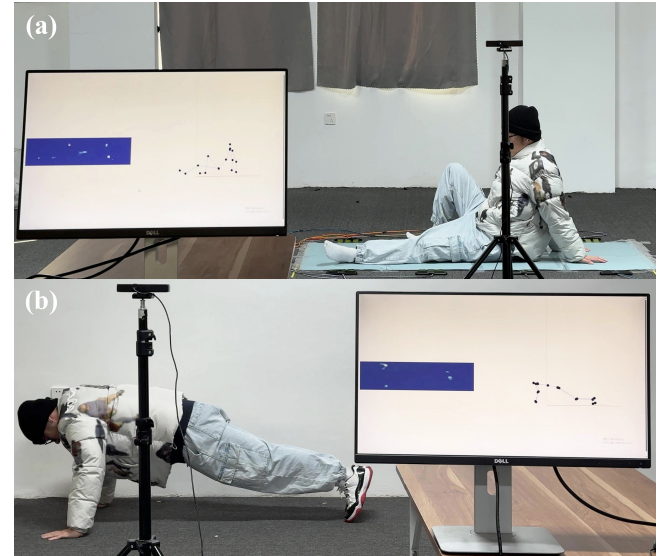**Figure 2: Real-time demonstration with monocular images and real (a) / reconstructed (b) pressure images as input.**

## 5 VIDEO

We provide a video containing the action demonstrations from the dataset, the dynamic visualizations of the pressure image reconstruction and 3D pose estimation results, as well as the live demo of the multimodal pose tracking system.

## REFERENCES

- [1] Zhe Cao, Tomas Simon, Shih-En Wei, and Yaser Sheikh. 2017. Realtime multi-person 2d pose estimation using part affinity fields. In *Proceedings of the IEEE conference on computer vision and pattern recognition*. 7291–7299.
- [2] Wenhao Li, Hong Liu, Runwei Ding, Mengyuan Liu, Pichao Wang, and Wenming Yang. 2022. Exploiting temporal contexts with strided transformer for 3d human pose estimation. *IEEE Transactions on Multimedia* 25 (2022), 1282–1293.
- [3] Wenhao Li, Hong Liu, Hao Tang, Pichao Wang, and Luc Van Gool. 2022. Mhformer: Multi-hypothesis transformer for 3d human pose estimation. In *Proceedings of the IEEE/CVF Conference on Computer Vision and Pattern Recognition*. 13147–13156.
- [4] Wenkang Shan, Zhenhua Liu, Xinfeng Zhang, Shanshe Wang, Siwei Ma, and Wen Gao. 2022. P-stmo: Pre-trained spatial temporal many-to-one model for 3d human pose estimation. In *European Conference on Computer Vision*. Springer, 461–478.

- [5] Wenkang Shan, Haopeng Lu, Shanshe Wang, Xinfeng Zhang, and Wen Gao. 2021. Improving robustness and accuracy via relative information encoding in 3d human pose estimation. In *Proceedings of the 29th ACM International Conference on Multimedia*. 3446–3454.
- [6] Bruce XB Yu, Zhi Zhang, Yongxu Liu, Sheng-hua Zhong, Yan Liu, and Chang Wen Chen. 2023. Gla-gcn: Global-local adaptive graph convolutional network for 3d human pose estimation from monocular video. In *Proceedings of the IEEE/CVF International Conference on Computer Vision*. 8818–8829.
- [7] Jinlu Zhang, Zhigang Tu, Jianyu Yang, Yujin Chen, and Junsong Yuan. 2022. Mixste: Seq2seq mixed spatio-temporal encoder for 3d human pose estimation in video. In *Proceedings of the IEEE/CVF conference on computer vision and pattern recognition*. 13232–13242.
- [8] Qitao Zhao, Ce Zheng, Mengyuan Liu, Pichao Wang, and Chen Chen. 2023. PoseFormerV2: Exploring Frequency Domain for Efficient and Robust 3D Human Pose Estimation. In *Proceedings of the IEEE/CVF Conference on Computer Vision and Pattern Recognition*. 8877–8886.

233  
234  
235  
236  
237  
238  
239  
240  
241  
242  
243  
244  
245  
246  
247  
248  
249  
250  
251  
252  
253  
254  
255  
256  
257  
258  
259  
260  
261  
262  
263  
264  
265  
266  
267  
268  
269  
270  
271  
272  
273  
274  
275  
276  
277  
278  
279  
280  
281  
282  
283  
284  
285  
286  
287  
288  
289  
290

291  
292  
293  
294  
295  
296  
297  
298  
299  
300  
301  
302  
303  
304  
305  
306  
307  
308  
309  
310  
311  
312  
313  
314  
315  
316  
317  
318  
319  
320  
321  
322  
323  
324  
325  
326  
327  
328  
329  
330  
331  
332  
333  
334  
335  
336  
337  
338  
339  
340  
341  
342  
343  
344  
345  
346  
347  
348
